# Supplementary material
Source: publisher figshare collection journal article supplement (https://acs.figshare.com/ndownloader/files/7812565)
Supplement: Supplementary file 1 [file 7812565]

# On the Hot Carrier Generation and Extraction of Plasmonic Alloy Nanoparticles

## *Supporting information*

Marco Valenti<sup>1,\*</sup>, Anirudh Venugopal<sup>1</sup>, Daniel Tordera<sup>2</sup>, Magnus P. Jonsson<sup>2</sup>, George  
Biskos<sup>3,4</sup>, Andreas Schmidt-Ott<sup>1</sup> & Wilson A. Smith<sup>1,\*</sup>

<sup>1</sup>*Materials for Energy Conversion and Storage (MECS), Department of Chemical  
Engineering, Faculty of Applied Sciences, Delft University of Technology, Delft 2628-BL, The  
Netherlands*

<sup>2</sup>*Laboratory of Organic Electronics, Department of Science and Technology, Campus  
Norrköping, Linköping University, SE-60174 Norrköping, Sweden*

<sup>3</sup>*Faculty of Civil Engineering and Geosciences, Delft University of Technology, Delft 2628-  
CN, The Netherlands*

<sup>4</sup>*Energy Environment and Water Research Center, The Cyprus Institute, Nicosia 2121,  
Cyprus*

\*Address correspondence to [m.valenti@tudelft.nl](mailto:m.valenti@tudelft.nl), [w.smith@tudelft.nl](mailto:w.smith@tudelft.nl)

*To be submitted to ACS Photonics*

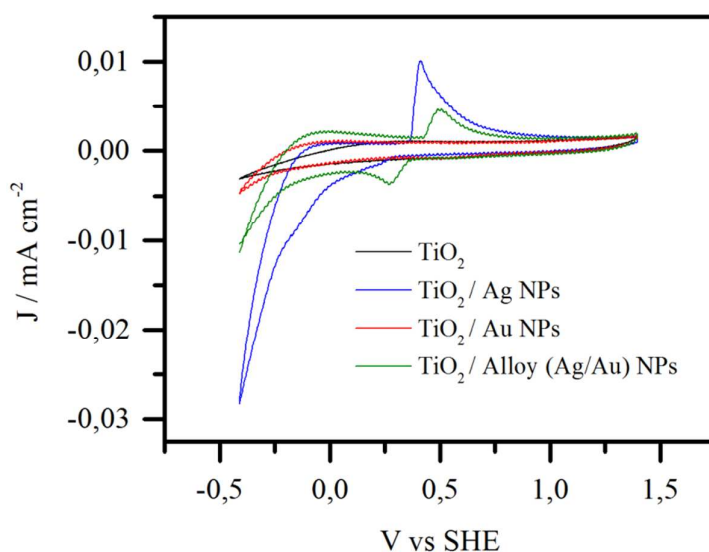

**Figure S1.** Anodic and cathodic cyclic voltammetry sweeps in the dark for the  $\text{TiO}_2$  films with and without decorating plasmonic PNPs.

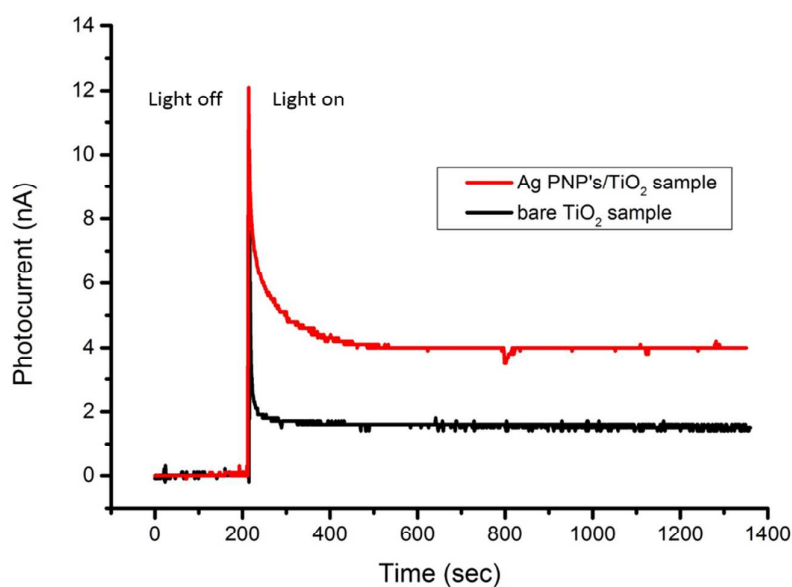

**Figure S2.** Photocurrent stability measurements of the bare  $\text{TiO}_2$  and  $\text{TiO}_2/\text{Ag}$  PNPs photoelectrodes when illuminated with monochromatic light ( $\lambda = 430 \text{ nm}$ ) at  $0.2 \text{ V vs SHE}$  with methanol-phosphate buffer (50 % v/v) as electrolyte.
